# Supplementary material for: Clinical Association between Gout and Parkinson’s Disease: A Nationwide Population-Based Cohort Study in Korea
Source: MDPI journal article supplement (doi:10.3390/medicina57121292), 2021-11-24
Supplement: s1 [file s1]

**Table S1.** Cox proportional hazard model of risk factors for Parkinson's disease by sex.

|                        | Male group<br>Adjusted HR<br>(95% CI) | P-value | Female group,<br>Adjusted HR<br>(95% CI) | P-value |
|------------------------|---------------------------------------|---------|------------------------------------------|---------|
| Gout                   | 0.96 (0.86-1.07)                      | 0.4485  | 1.19 (0.96-1.47)                         | 0.1176  |
| Hypertension           | 1.12 (0.96-1.3)                       | 0.1432  | 1.46 (0.96-2.22)                         | 0.0793  |
| Diabetes               | 0.95 (0.84-1.08)                      | 0.4145  | 0.84 (0.65-1.1)                          | 0.2036  |
| Dyslipidemia           | 0.6 (0.52-0.69)                       | <.0001  | 0.59 (0.42- 0.82)                        | 0.0017  |
| Ischemic heart disease | 0.98 (0.87-1.09)                      | 0.6557  | 1.07 (0.85- 1.34)                        | 0.5597  |
| Stroke                 | 2.15 (1.91 -2.41)                     | <.0001  | 1.39 (1.12-1.73)                         | 0.0025  |

HR: hazard ratio (using the Cox proportional hazard model), CI: confidence interval
